# Supplementary material for: Excitation of chorus with small wave normal angles due to BPA mechanism into density ducts
Source: Copernicus journal article supplement (doi:10.5194/angeo-2019-83), 2019-06-17
Supplement: Supplementary file [file angeo-2019-83-AC3-supplement.pdf]

We would like to thank the Reviewer #2 for the time he/she spent reading, positive response, and conclusion: "the paper can be published now".
